# Supplementary material for: Capturing Value in Platform Business Models That Rely on User-Generated Content
Source: Atypon-hosted journal article supplement (doi:10.1287/orsc.2020.1408), 2021-01-13
Supplement: orsc.2020.1408.sm1.pdf [file orsc.2020.1408.sm1.pdf]

## Appendix A: Details of Acquisition Targets and Classification

|   | <b>Target</b>     | <b>Acquirer</b>   | <b>Date</b> | <b>Target Description</b>                                                                                   | <b>Category<sup>1</sup></b> | <b>Brief Justification</b>                                                                               | <b>Primary Content<sup>2</sup></b> |
|---|-------------------|-------------------|-------------|-------------------------------------------------------------------------------------------------------------|-----------------------------|----------------------------------------------------------------------------------------------------------|------------------------------------|
| 1 | About.com         | IAC               | 8/26/12     | Information on general interest topics using links, descriptions and videos                                 | 1                           | Firm creates or aggregates from multiple other sites                                                     | EC, CA                             |
| 2 | Archives.com      | Ancestry          | 4/25/12     | Family history maintenance network where users can access information about their family tree and ancestors | 1                           | Aggregates public records through technology owned by the firm                                           | CA                                 |
| 3 | Bankaholic        | Bankrate          | 9/23/08     | Financial portal that provides information on interest rates, credit cards, insurance quotes and tips       | 1                           | Aggregates data from financial institutions and insurance companies through technology owned by the firm | CA                                 |
| 4 | BankingMyWay.com  | TheStreet.com     | 11/2/07     | Provides interest rate information from over 53,000 financial institutions                                  | 1                           | Aggregates data from financial institutions through technology owned by the firm                         | CA                                 |
| 5 | Banks.com         | Remark Media Inc. | 6/28/12     | Provides interest rate and other product information from a large number of banks                           | 1                           | Aggregates data from financial institutions through technology owned by the firm                         | CA                                 |
| 6 | BeatThatQuote.com | Google            | 3/7/11      | British price comparison site specializing in personal finance products                                     | 1                           | Aggregates data from financial institutions and insurance companies through technology owned by the firm | CA                                 |
| 7 | BioMed Central    | Springer          | 10/6/08     | Publishes research on biological/medical topics                                                             | 1                           | Editorial content consisting of peer reviewed articles                                                   | EC                                 |
| 8 | BookRags          | Ambassadors Group | 5/22/08     | Educational website that provides summaries, study guides and lesson plans on various literary works        | 1                           | Firm creates editorial content for students                                                              | EC                                 |
| 9 | BrightNest        | Angie's List      | 8/2/13      | Provides tips and tools on home improvement projects                                                        | 1                           | Firm creates editorial content for homeowners                                                            | EC                                 |

<sup>1</sup> Category 1 for firm generated content, Category 2 for user contributed content, and Category 3 for interaction generated content

<sup>2</sup> EC – Editorial Content, CA – Content Aggregator, AC – Algorithmic Content, ST – Search Tool, LD – Listing and Directory Content, UU – User Uploaded Content, JP – Job Posting Site, QA – Question and Answer Site, BH – Blog Hosting Site, RR – Ratings and Review site, SN – Social Networks, OC – Online Communities, DW – Dating sites, SG – Social Gaming sites, EP – Electronic Commerce Platform; MP – Messaging Platform

|    | <b>Target</b>     | <b>Acquirer</b>        | <b>Date</b> | <b>Target Description</b>                                                                                   | <b>Category<sup>1</sup></b> | <b>Brief Justification</b>                                                                                | <b>Primary Content<sup>2</sup></b> |
|----|-------------------|------------------------|-------------|-------------------------------------------------------------------------------------------------------------|-----------------------------|-----------------------------------------------------------------------------------------------------------|------------------------------------|
| 10 | Caring.com        | bankrate.com           | 5/7/14      | Portal for those seeking information about care services for aging parents, spouses and other loved ones.   | 1                           | Listing of various care services aggregated through a single portal                                       | LD, ST                             |
| 11 | CarInsurance.com  | QuinStreet             | 11/8/10     | Consumers can compare insurance quotes from multiple providers                                              | 1                           | Aggregates data from insurance providers using firm owned technology                                      | CA                                 |
| 12 | Class.com         | Cambium Learning Group | 9/22/11     | Online courses on a variety of subjects based on subscription fees                                          | 1                           | Firm creates editorial content for students                                                               | EC                                 |
| 13 | Clusty            | Yippy                  | 5/17/10     | Intelligent search engine that generates an ordered and ranked list                                         | 1                           | Firm owned technology and algorithms create ordered search output                                         | AC, ST                             |
| 14 | CNET Networks     | CBS                    | 5/15/08     | Online media company that focuses on technology industry and products                                       | 1                           | Editorial reviews of technology products and news about technology industry                               | EC                                 |
| 15 | Compfight         | Eezy Inc.              | 1/1/12      | Search engine for photos and images                                                                         | 1                           | Algorithms developed by the firm create list of images                                                    | ST                                 |
| 16 | ContentNext Media | Guardian Media Group   | 7/11/08     | Media company with websites focused on the digital media industry                                           | 1                           | Owns three news-oriented sites with editorial content: paidcontent.org, mocoNews.com and contentSutra.com | EC                                 |
| 17 | CreditCards.com   | Bankrate               | 6/28/10     | Provides information on credit cards                                                                        | 1                           | Aggregates information on credit cards from multiple sources using firm owned technology                  | CA                                 |
| 18 | Dapper            | Yahoo!                 | 10/6/10     | Enables users to extract data from any website, and then creates useful services around this extracted data | 1                           | Firm owned technology enables the services provided                                                       | AC                                 |
| 19 | Ducksboard        | New Relic              | 10/8/14     | Integrates data from multiple sources into a dashboard                                                      | 1                           | Algorithmic tool to aggregate and present data                                                            | AC                                 |
| 20 | Easytobook        | makemytrip             | 2/6/14      | Information on rates and availability of hotel rooms worldwide                                              | 1                           | Firm generated information and information aggregated from other sources                                  | ST, LD                             |
| 21 | eDiets.com        | As Seen On TV          | 8/10/12     | Provides information on nutrition, weight-loss and healthy recipes                                          | 1                           | Firm creates recipes, nutrition information and weight-loss programs                                      | EC                                 |
| 22 | eTapestry         | Blackbaud              | 8/7/07      | Supports online fund-raising and donor programs for non-profits                                             | 1                           | Provides access to firm owned software                                                                    | AC                                 |

|    | <b>Target</b>      | <b>Acquirer</b> | <b>Date</b> | <b>Target Description</b>                                                                             | <b>Category<sup>1</sup></b> | <b>Brief Justification</b>                                                  | <b>Primary Content<sup>2</sup></b> |
|----|--------------------|-----------------|-------------|-------------------------------------------------------------------------------------------------------|-----------------------------|-----------------------------------------------------------------------------|------------------------------------|
| 23 | Fandango           | Comcast         | 4/11/07     | Provides access to movie trailers and other movie related content                                     | 1                           | Firm and movie industry partners create content                             | EC, CA                             |
| 24 | FeedBurner         | Google          | 5/23/07     | Allows users to aggregate content from multiple websites and create a RSS feed                        | 1                           | Firm owned algorithms and technology allow users to aggregate content       | CA, AC                             |
| 25 | Fflick             | Google          | 1/25/11     | Provides access to reviews, information, and news about films that is aggregated from Twitter         | 1                           | Firm owned technology aggregates and organizes content from Twitter         | AC, CA                             |
| 26 | Followerwonk       | SEOMoz          | 8/15/12     | Provides access to Twitter analytics and data                                                         | 1                           | Firm owned technology aggregates and analyzes information from Twitter      | AC, CA                             |
| 27 | Footnote           | Ancestry        | 9/23/10     | Access to original source documents from various archives on the internet                             | 1                           | Firm owned technology aggregates documents from multiple sources            | CA                                 |
| 28 | GetListed.org      | SEOMoz          | 12/4/12     | Shows small business owners how well they are listed in local searches on Google, Yahoo, and Bing     | 1                           | Firm owned technology analyzes search engine optimization                   | AC                                 |
| 29 | Global Scholar     | Scantron        | 12/16/10    | Two services, SchoolFinder and CollegeFinder, enable parents and students to learn more about schools | 1                           | Firm owned technology aggregates content about schools from various sources | CA                                 |
| 30 | HotPads            | Zillow          | 11/26/12    | Map-based apartment and home rental search engine                                                     | 1                           | Provides search technology to view apartment listings online                | ST                                 |
| 31 | Huffingtonpost.com | AOL             | 2/7/11      | News website                                                                                          | 1                           | Editorial content on various topics                                         | EC                                 |
| 32 | Hunch              | eBay            | 11/21/11    | Uses algorithms to determine the affinity of every entity on the web with every other entity          | 1                           | Firm owned technology makes suggestions to the user                         | AC                                 |
| 33 | InsureMe           | Bankrate        | 2/5/08      | Provides insurance information and insurance quotes                                                   | 1                           | Aggregates information from multiple insurance providers                    | CA                                 |
| 34 | Internet.com       | QuinStreet      | 11/30/09    | News site focused on cloud computing, virtualization, mobility, security, networking, and more        | 1                           | Aggregates news from multiple sources and editorial content                 | CA, EC                             |

|    | <b>Target</b>      | <b>Acquirer</b>     | <b>Date</b> | <b>Target Description</b>                                                           | <b>Category<sup>1</sup></b> | <b>Brief Justification</b>                                                           | <b>Primary Content<sup>2</sup></b> |
|----|--------------------|---------------------|-------------|-------------------------------------------------------------------------------------|-----------------------------|--------------------------------------------------------------------------------------|------------------------------------|
| 35 | Jigsaw             | Salesforce          | 4/21/10     | Directory of companies and professionals                                            | 1                           | Listing of companies and professionals aggregated by the firm from various sources   | LD                                 |
| 36 | Kaboose            | Walt Disney Company | 4/1/09      | Focuses on family activities and parenting                                          | 1                           | Editorial content around parenting and family related activities                     | EC                                 |
| 37 | Kosmix             | Walmart             | 4/18/11     | Guide to the Web that lets users explore the Web by topic                           | 1                           | A search tool to explore the web                                                     | ST                                 |
| 38 | Krillion           | Local.com           | 5/2/11      | Compares and connects with local retailers                                          | 1                           | Aggregates content from multiple retailers so users can compare                      | CA                                 |
| 39 | Learning.com       | Educomp Solutions   | 5/21/08     | Digital curriculum and assessments to help students learn                           | 1                           | Firm creates editorial content for students                                          | EC                                 |
| 40 | LexiaLearning.com  | Rosetta Stone       | 7/25/13     | Spanish language training website                                                   | 1                           | Firm creates editorial content for learning Spanish                                  | EC                                 |
| 41 | Lexicon Publishing | Ask.com             | 5/15/08     | Provides an online dictionary and thesaurus                                         | 1                           | Firm creates editorial content about words and language                              | EC                                 |
| 42 | Like.com           | Google              | 8/16/10     | Price comparison service and a visual search engine for products                    | 1                           | Provides a visual search tool for products                                           | ST, CA                             |
| 43 | Lovely.com         | Rentpath            | 4/2/14      | Marketplace for available rentals                                                   | 1                           | Listing of rentals aggregated by the firm from many sources and a rental search tool | LD                                 |
| 44 | Lycos              | Brent Digital       | 8/15/10     | Search engine, online games, and email services                                     | 1                           | Primarily a search engine                                                            | ST, AC                             |
| 45 | Melodeo            | Hewlett-Packard     | 6/24/10     | Delivers music and other media to the Web and mobile devices                        | 1                           | Aggregates music content from other sources                                          | CA                                 |
| 46 | MerchantCircle     | Reply.com           | 5/26/11     | Online local marketing platform that provides deals and quotes from local merchants | 1                           | Aggregates content from multiple retailers                                           | CA                                 |
| 47 | MeziMedia          | ValueClick          | 7/16/07     | Comparative shopping and online coupon sites                                        | 1                           | Aggregates content from multiple retailers                                           | CA                                 |
| 48 | Mint.com           | Intuit              | 9/14/09     | Tool to organize and categorize consumer spending                                   | 1                           | Provides access to an online software owned by the firm                              | AC                                 |

|    | <b>Target</b>     | <b>Acquirer</b>              | <b>Date</b> | <b>Target Description</b>                                                                                             | <b>Category<sup>1</sup></b> | <b>Brief Justification</b>                                                            | <b>Primary Content<sup>2</sup></b> |
|----|-------------------|------------------------------|-------------|-----------------------------------------------------------------------------------------------------------------------|-----------------------------|---------------------------------------------------------------------------------------|------------------------------------|
| 49 | MoG               | Beats Electronics            | 7/2/12      | Music site                                                                                                            | 1                           | Aggregates music content from other sources                                           | CA                                 |
| 50 | MyNewPlace        | RealPage                     | 8/22/11     | Rental listings in buildings, apartment complexes and houses across the US                                            | 1                           | Search tool for rentals                                                               | ST                                 |
| 51 | Naplyrics.com     | Media Group                  | 8/14/13     | Provides access to song lyrics                                                                                        | 1                           | Aggregates content from other sources                                                 | CA                                 |
| 52 | Napster           | Best Buy                     | 9/15/08     | Streaming music service                                                                                               | 1                           | At the time of acquisition, Napster was a music service without user provided content | EC                                 |
| 53 | NetQuote.com      | Nankrate                     | 6/29/10     | Provides online quotes for home and auto insurance                                                                    | 1                           | Aggregates information from insurance companies                                       | CA                                 |
| 54 | NextBus           | Cubic Transportation Systems | 1/27/13     | Provides bus and train arrival and departure information and real-time maps to passengers and others                  | 1                           | Provides access to software that calculates vehicle arrival times                     | AC                                 |
| 55 | Newsy             | EW Scripps                   | 12/9/13     | Multisource video news service that analyzes world news and produces streaming video clips.                           | 1                           | Firm generated news site and news aggregator                                          | EC, CA                             |
| 56 | Opentable         | Priceline                    | 6/13/14     | Directory of restaurants with ability to make reservations                                                            | 1                           | Listing of restaurants with minimal interaction features beyond reservations          | LD                                 |
| 57 | Pageflakes        | LiveUniverse                 | 4/18/08     | Users create homepages by choosing from “pageflakes” (widgets) provided by the firm                                   | 1                           | A tool provided by the firm to create webpages                                        | AC                                 |
| 58 | Picnik            | Google                       | 3/2/10      | Photo editing service                                                                                                 | 1                           | Provides access to a photo-editing software                                           | AC                                 |
| 59 | Pixable.com       | SingTel Digital              | 9//12       | Finds the most relevant photos and videos shared on a user’s social network so that they never miss important moments | 1                           | Search tool for photos and videos located on the user’s social networks               | ST                                 |
| 60 | PokerStrategy.com | Playtech                     | 7/11/13     | Provides educational videos and articles about poker                                                                  | 1                           | Firm and its affiliates create editorial content about poker                          | EC                                 |

|    | <b>Target</b>  | <b>Acquirer</b>         | <b>Date</b> | <b>Target Description</b>                                                                          | <b>Category<sup>1</sup></b> | <b>Brief Justification</b>                                                              | <b>Primary Content<sup>2</sup></b> |
|----|----------------|-------------------------|-------------|----------------------------------------------------------------------------------------------------|-----------------------------|-----------------------------------------------------------------------------------------|------------------------------------|
| 61 | Purepeople.com | FIMALAC Group           | 9/12/13     | European news site focused on the media and entertainment industry                                 | 1                           | Firm and its affiliates create news articles about the media and entertainment industry | EC                                 |
| 62 | QualityHealth  | webMD                   | 9/15/08     | Provides information on a variety of health related topics                                         | 1                           | Provides health information created by the firm                                         | EC                                 |
| 63 | RealAge        | Hearst Corporation      | 9/18/07     | Provides health information to consumers                                                           | 1                           | Firm creates editorial content such as health guides, doctor visit guides, etc.         | EC                                 |
| 64 | RealEstate.com | Market Leader Inc.      | 9/21/11     | Search tool for local homes for sale and licensed realtors                                         | 1                           | Provides access to a real estate search tool                                            | ST                                 |
| 65 | Relocation.com | Move Inc.               | 10/11/12    | Resources for individuals looking to relocate                                                      | 1                           | Provides access to a real estate search tool and other relocation resources             | ST, EC                             |
| 66 | Rent.com       | PriMedia                | 3/22/12     | Search tool for apartments and homes for rent                                                      | 1                           | Provides access to a real estate search tool                                            | ST                                 |
| 67 | RentMineOnline | RealPage                | 7/23/12     | Real estate listings with online referrals                                                         | 1                           | Provides access to a search and online referral tool for renters                        | ST, AC                             |
| 68 | ReserveAmerica | The Active Network      | 1/23/09     | Provides reservation and campground management solutions online                                    | 1                           | Provides access to a software tool for managing campgrounds                             | AC                                 |
| 69 | Revision3      | Discovery Communication | 5/3/12      | Internet television network that creates, produces and distributes online TV shows on niche topics | 1                           | Firm creates content on niche topics                                                    | EC                                 |
| 70 | Rigzone.com    | Dice Holdings           | 8/12/10     | News and information about the oil and gas industry                                                | 1                           | Firm creates news content                                                               | EC                                 |
| 71 | RISI           | United Business Media   | 7/13/09     | News and information on the forest products industry                                               | 1                           | Firm creates news content                                                               | EC                                 |
| 72 | Rivals.com     | Yahoo!                  | 6/21/07     | News and information for college sports fans                                                       | 1                           | Firm creates news content                                                               | EC                                 |
| 73 | Savings.com    | Cox Target Media Inc.   | 6/21/12     | Offers coupons and deals from multiple retailers                                                   | 1                           | Aggregates content from and connects to multiple retailers                              | CA                                 |

|    | <b>Target</b>   | <b>Acquirer</b>    | <b>Date</b> | <b>Target Description</b>                                                                                                                                                | <b>Category<sup>1</sup></b> | <b>Brief Justification</b>                                                                                  | <b>Primary Content<sup>2</sup></b> |
|----|-----------------|--------------------|-------------|--------------------------------------------------------------------------------------------------------------------------------------------------------------------------|-----------------------------|-------------------------------------------------------------------------------------------------------------|------------------------------------|
| 74 | School net      | Pearson            | 4/27/11     | Provides educational material and tools for use by teachers and school administrators                                                                                    | 1                           | Firm creates and aggregates content                                                                         | EC, CA                             |
| 75 | ShopWell        | HarvestMark        | 5/29/13     | Health information about popular food items and healthy alternatives                                                                                                     | 1                           | Firm creates and aggregates content                                                                         | EC, CA                             |
| 76 | SideStep        | KAYAK              | 12/21/07    | Meta-search engine for travel                                                                                                                                            | 1                           | Offers technology that searches multiple travel sites                                                       | ST, CA                             |
| 77 | SignNow         | Barracuda Networks | 5/14/13     | Tool for digital signatures that allows users to obtain verified digital signatures and sign digital content                                                             | 1                           | Provides access to software for digital signatures developed by the firm                                    | AC                                 |
| 78 | Single Platform | Constant Contact   | 6/15/12     | Allows restaurants and other businesses to publish their content (menus, products, prices etc.) across multiple channels, search engines, travel guides and other sites. | 1                           | Provides a tool to small businesses to reach a wide range of customers                                      | AC                                 |
| 79 | Smilebox        | IncrediMail        | 8/1/11      | Create greeting cards, scrapbooks, slideshows, birthday cards, and more using photos, videos, and music                                                                  | 1                           | Provides access to software for creating greeting cards                                                     | AC                                 |
| 80 | StreetEasy.com  | Zillow             | 8//13       | Real estate listings in New York City                                                                                                                                    | 1                           | Search tool for New York real estate                                                                        | ST, CA                             |
| 81 | StumbleUpon     | eBay               | 5/31/07     | Store, organize and search for web addresses                                                                                                                             | 1                           | Provides access to a software tool to store, organize and access URLs                                       | AC                                 |
| 82 | Stylecaster     | SheKnows Media     | 8/12/14     | News and articles on fashion, beauty and lifestyle-related topics.                                                                                                       | 1                           | Editorial content on fashion and style related topics                                                       | EC                                 |
| 83 | Svpply          | eBay               | 9/6/12      | Suggests products that users may like based on the likes of your Twitter and Facebook friends                                                                            | 1                           | Provides access to data pulled from other sources (Facebook and Twitter) and algorithms for recommendations | AC, CA                             |
| 84 | Switchboard.com | SuperMedia         | 9/17/07     | Provides Internet based Yellow Pages and local online advertising                                                                                                        | 1                           | Listing and directory service that matches consumers and businesses                                         | LD                                 |
| 85 | Travel.ru       | Oktoгу.ru          | 9/5/13      | Allows users to find and book travel in Russia                                                                                                                           | 1                           | Search tool that focuses on finding travel related products and services                                    | ST                                 |

|    | <b>Target</b>       | <b>Acquirer</b>      | <b>Date</b> | <b>Target Description</b>                                                                                                 | <b>Category<sup>1</sup></b> | <b>Brief Justification</b>                                                                             | <b>Primary Content<sup>2</sup></b> |
|----|---------------------|----------------------|-------------|---------------------------------------------------------------------------------------------------------------------------|-----------------------------|--------------------------------------------------------------------------------------------------------|------------------------------------|
| 86 | Trovit              | Next Co              | 10/7/14     | Search engine for classified ads on real estate, jobs, cars and rentals                                                   | 1                           | Search engine and listing service                                                                      | ST, LD                             |
| 87 | Viki                | Rakuten              | 9/1/13      | Streams TV shows, movies, music videos and other premium content translated into and subtitled in more than 150 languages | 1                           | Aggregates third party content from multiple sources with some value added features such as sub-titles | CA, EC                             |
| 88 | Webs.com            | VistaPrint           | 12//11      | Provides a tool to build a customized business website through a completely browser-based interface                       | 1                           | Provides access to a software tool that creates a website                                              | AC                                 |
| 89 | Xobni.com           | Yahoo                | 7/3/13      | Provides a tool to improve user inbox and address book by using data from LinkedIn and Facebook                           | 1                           | Provides access to algorithms for improving user inbox and address book                                | AC                                 |
| 90 | Zagat               | Google               | 9/8/11      | Provides editorial ratings of restaurants, night clubs and hotels                                                         | 1                           | Firm and its affiliates (primarily) create ratings and reviews                                         | EC                                 |
| 91 | Ziplocal            | Canpages             | 6/22/09     | Directory connecting buyers and local businesses in Canada                                                                | 1                           | Listing and directory of local businesses                                                              | LD                                 |
| 92 | about.me            | AOL                  | 12/21/10    | Users upload a personal profile and maintain it                                                                           | 2                           | Users upload their profiles and search for other user profiles                                         | UU                                 |
| 93 | all recipes         | Meredith Corporation | 1/24/12     | Shares recipes that are rated and reviewed by other users                                                                 | 2                           | Users upload recipes and how-to-videos about food and cooking                                          | UU                                 |
| 94 | AllHealthCareJobs   | Dice Holdings        | 6/11/09     | Job listing service for the healthcare sector                                                                             | 2                           | Users upload jobs and profiles                                                                         | JP                                 |
| 95 | Answers Corporation | AFCV Holdings        | 2/4/11      | Question and answer site where users post questions and answers                                                           | 2                           | Users upload questions which are answered by other users of the website                                | QA                                 |
| 96 | Blogher             | SheKnows Media       | 11/3/14     | Blog hosting site that targets women users                                                                                | 2                           | Blog hosting site                                                                                      | BH                                 |
| 97 | Bright.com          | LinkedIn             | 2/6/2014    | Portal to connect job seekers and to job postings                                                                         | 2                           | Users post resumes, and employers post job openings                                                    | JP                                 |
| 98 | Clipboard           | SalesForce           | 5/9/13      | Worldwide clipping service where users clip and share portions of the internet they like                                  | 2                           | Users upload and share web clippings                                                                   | UU                                 |

|     | <b>Target</b>    | <b>Acquirer</b>         | <b>Date</b> | <b>Target Description</b>                                                                                                                 | <b>Category<sup>1</sup></b> | <b>Brief Justification</b>                                                          | <b>Primary Content<sup>2</sup></b> |
|-----|------------------|-------------------------|-------------|-------------------------------------------------------------------------------------------------------------------------------------------|-----------------------------|-------------------------------------------------------------------------------------|------------------------------------|
| 99  | eBaumsWorld      | ZVUE                    | 8/3/07      | Funny videos, pictures, galleries, links, jokes, captions and photos                                                                      | 2                           | Users upload content they find humorous                                             | UU                                 |
| 100 | E-Box - Blog.it  | Populis                 | 1/17/11     | Blog hosting site in Italy                                                                                                                | 2                           | Users create and read blogs                                                         | BH                                 |
| 101 | Foodspotting.com | OpenTable               | 1/29/13     | Provides access to menus and images from a large number of restaurants                                                                    | 2                           | Firm owned technology aggregates information from multiple restaurants              | CA                                 |
| 102 | Forumer          | CrowdGather             | 4/18/11     | Blog or forum hosting site                                                                                                                | 2                           | Users create topic based forums where other users can contribute                    | BH                                 |
| 103 | FreeForums.org   | CrowdGather             | 3/16/10     | Blog or forum hosting site                                                                                                                | 2                           | Users create topic based forums where other users can contribute                    | BH                                 |
| 104 | Health Grades    | Vestar Capital Partners | 7/28/10     | Provides quality and safety ratings of health care providers based on patient reviews and allows patients to search for providers online. | 2                           | Provides user reviews of healthcare providers                                       | RR                                 |
| 105 | Imagekind        | CafePress               | 7/8/11      | Artists upload original images that others can view and buy                                                                               | 2                           | Users upload images and others can view these images                                | UU                                 |
| 106 | InsiderPages     | CitySearch              | 3/1/07      | Users read and post reviews about services                                                                                                | 2                           | Users upload and view reviews of businesses                                         | RR                                 |
| 107 | Internships.com  | Chegg                   | 10/2/2014   | Portal to connect job seekers and to job postings                                                                                         | 2                           | Users post resumes, and employers post job openings                                 | JP                                 |
| 198 | Jobs2web         | SuccessFactors          | 12/6/11     | Job posting and search website                                                                                                            | 2                           | Users create profiles and search for jobs online                                    | JP                                 |
| 109 | Kaboodle.com     | Hearst Corporation      | 8/8/07      | Shopping website where consumers list, recommend, review and discover new products                                                        | 2                           | Users share shopping related recommendations, and also view what others have shared | RR                                 |
| 110 | Menupages        | Seamless                | 9/26/11     | Restaurants upload their menus so that consumers can search by cuisine, area and neighborhood                                             | 2                           | Restaurants upload menus so that consumers can what they are looking for            | UU                                 |
| 111 | MisterPoll       | PollBob                 | 1/16/12     | Users create opinion polls on the Internet to which others can respond and view results                                                   | 2                           | Users upload and update polls on a variety of topics and view results               | UU                                 |

| <b>Target</b>     | <b>Acquirer</b> | <b>Date</b> | <b>Target Description</b>                                                                                   | <b>Category<sup>1</sup></b> | <b>Brief Justification</b>                                                                               | <b>Primary Content<sup>2</sup></b> |
|-------------------|-----------------|-------------|-------------------------------------------------------------------------------------------------------------|-----------------------------|----------------------------------------------------------------------------------------------------------|------------------------------------|
| 112 MyBlogLog     | Yahoo!          | 1/9/07      | Blog hosting site                                                                                           | 2                           | Users create, distribute their blogs and subscribe to other blogs across multiple blog hosting locations | BH                                 |
| 113 NowPublic     | Examiner.com    | 9/1/09      | Crowdsourcing news network empowering the ordinary citizen to upload news articles of interest              | 2                           | Users create news articles and read news articles written by others                                      | UU                                 |
| 114 Photobucket   | News Corp       | 5/8/07      | Image and video hosting site to upload, edit and share video content                                        | 2                           | Users upload and view videos and photos to share with others                                             | UU                                 |
| 115 Phanfare      | Carbonite       | 6/15/11     | Photo hosting and photo sharing platform                                                                    | 2                           | Users upload and view videos and photos to share with others                                             | UU                                 |
| 116 Plixi         | Lockerz         | 1/15/11     | Photo hosting and sharing platform                                                                          | 2                           | Users share photos, and view photos shared by others                                                     | UU                                 |
| 117 Posterous     | twitter         | 3/12/12     | Blog hosting website                                                                                        | 2                           | Users create and view blogs                                                                              | BH                                 |
| 118 Qype          | Yelp            | 10/24/12    | Reviews of businesses and places of interest based in Europe                                                | 2                           | Users read and write reviews                                                                             | RR                                 |
| 119 Revver        | LiveUniverse    | 2/19/08     | Sharing for user-generated videos                                                                           | 2                           | Users upload videos and view videos from others                                                          | UU                                 |
| 120 RuTube        | Gazprom-Media   | 3/6/08      | Shares videos targeted at Russian speakers                                                                  | 2                           | Users upload videos and view videos from others (mostly in Russian)                                      | UU                                 |
| 121 Shahiya.com   | Cookpad         | 10/30/14    | Website for user contributed recipes                                                                        | 2                           | Users upload recipes for others to download                                                              | UU                                 |
| 122 Snip.it       | Yahoo           | 1/22/13     | Allows users to upload and share clippings from the Internet                                                | 2                           | Users upload and share clippings from the internet                                                       | UU                                 |
| 123 TheITJobBoard | Dice Holdings   | 7/25/13     | Job portal for IT jobs                                                                                      | 2                           | Users post resumes, and employers post job openings in the IT sector                                     | JP                                 |
| 124 TotalJobs.com | Axel Springer   | 4/4/12      | Job search and listing site in the United Kingdom                                                           | 2                           | Users post resumes, and employers post job openings                                                      | JP                                 |
| 125 Trovix        | Monster         | 7/31/08     | Job search and listing site that uses artificial intelligence technology to match job seekers and employers | 2                           | Users post resumes, and employers post job openings                                                      | JP                                 |

| <b>Target</b>            | <b>Acquirer</b>     | <b>Date</b> | <b>Target Description</b>                                                                                 | <b>Category<sup>1</sup></b> | <b>Brief Justification</b>                                                              | <b>Primary Content<sup>2</sup></b> |
|--------------------------|---------------------|-------------|-----------------------------------------------------------------------------------------------------------|-----------------------------|-----------------------------------------------------------------------------------------|------------------------------------|
| 126 Tumblr               | Yahoo!              | 5//13       | Microblogging site for users to post content and to read posts by others                                  | 2                           | Users read and write short posts                                                        | BH                                 |
| 127 Twitch.com           | Amazon              | 8/25/2014   | Users can broadcast their video games for others to watch                                                 | 2                           | Users broadcast their video games for others to watch                                   | UU                                 |
| 128 Worldwide-Worker.com | Dice Holdings       | 5/10/10     | Job portal for all kinds of jobs                                                                          | 2                           | Users post resumes, and employers post job openings                                     | JP                                 |
| 129 AffairMatch          | AdultSpace          | 4/22/09     | Dating and interaction site for adults                                                                    | 3                           | Provides an interaction forum for adults looking for dates                              | DW                                 |
| 130 Branchout.com        | Hearst              | 9/19/2014   | Share everyday moments at work through videos, photos and news                                            | 3                           | Social network to interact with others in the workplace in defined groups               | SN                                 |
| 131 ClubPenguin          | Walt Disney Company | 8/2/07      | Virtual world for kids to interact in a safe and secure environment                                       | 3                           | Provides an interaction forum for kids                                                  | OC                                 |
| 132 DailyStrength        | HSW International   | 12/3/08     | Creating emotional support groups for mutual support during difficult times                               | 3                           | Users form support groups around health related issues and interact within their groups | OC                                 |
| 133 Friendster           | MOL Global          | 12/5/09     | Social networking site                                                                                    | 3                           | Enables users to connect and interact with each other                                   | SN                                 |
| 134 FriendFeed           | Facebook            | 8/10/09     | Allows users to share and discuss content with friends, family and co-workers across many social networks | 3                           | A social network that integrates with other social networks                             | SN                                 |
| 135 Gala-net             | WebZen              | 2/1/13      | Social gaming portal                                                                                      | 3                           | Users play games in social settings                                                     | SG                                 |
| 136 Going                | AOL                 | 6/11/09     | Event goers interact with others prior to, during and after the event                                     | 3                           | Enables interaction between users who attend an event (e.g. concert)                    | OC                                 |
| 137 GoodReads            | Amazon              | 3/28/13     | Readers connect with others who share their reading interests and authors connect with their readers      | 3                           | Enables social interactions around books                                                | OC                                 |
| 138 Healthcare magic.com | Ebix                | 5.27/2014   | Facilitates real-time interactions between doctors and patients                                           | 3                           | Supports repeated interactions between doctors and patients                             | OC                                 |
| 139 Instaedu.com         | Chegg               | 6/3/2014    | Platform to connect tutors and students for private tutoring online                                       | 3                           | Supports repeated interactions between students and tutors                              | OC                                 |

| <b>Target</b>  | <b>Acquirer</b>               | <b>Date</b> | <b>Target Description</b>                                                                                                                                   | <b>Category<sup>1</sup></b> | <b>Brief Justification</b>                                                                        | <b>Primary Content<sup>2</sup></b> |
|----------------|-------------------------------|-------------|-------------------------------------------------------------------------------------------------------------------------------------------------------------|-----------------------------|---------------------------------------------------------------------------------------------------|------------------------------------|
| 140 Kiwibox    | Magnitude Information Systems | 2/23/07     | Social networking site for teens                                                                                                                            | 3                           | Provides a forum for teens to interact                                                            | SN                                 |
| 141 MedFusion  | Intuit                        | 5/11/10     | A portal to connect healthcare providers with patients. Provides patient-to-provider (and vice versa) communication solutions                               | 3                           | Provides access to hospital management software owned by the firm                                 | OC, EP                             |
| 142 Mytopia    | 888 holdings                  | 6/14/10     | Online social gaming website                                                                                                                                | 3                           | Users play games in social settings                                                               | SG                                 |
| 143 MyYearBook | Quepasa                       | 7//11       | Social network for high school students                                                                                                                     | 3                           | Facilitates interactions among high school students                                               | SN                                 |
| 144 OkCupid    | IAC                           | 2/2/11      | Friendship, dating and social networking website                                                                                                            | 3                           | Users upload and view profiles and interact with others in the dating context                     | DW                                 |
| 145 OpenLane   | KAR Auction Services          | 8/15/11     | Online vehicle auction where auto dealers buy and sell vehicles. The website provides end-to-end support to participants to buy and sell automobiles online | 3                           | Allows interactions and ancillary services in the context of buying and selling cars online       | EP, OC                             |
| 146 PartnerUp  | Deluxe                        | 7/30/08     | Social network for entrepreneurs and startups that helps them interact with others in that community                                                        | 3                           | Facilitates interactions with other entrepreneurs to find partners, board members and co-founders | SN                                 |
| 147 Plaxo      | Comcast                       | 5/15/08     | Integrates user address books with social networks and other contact management software                                                                    | 3                           | Integrates with social networks – facilitates interaction around the address book of users        | OC                                 |
| 148 Playdom    | Walt Disney                   | 7/24/10     | Social gaming platform popular on Facebook and Google+                                                                                                      | 3                           | Users play games in social settings                                                               | SG                                 |
| 149 Playfish   | Electronic Arts               | 11/9/09     | Free-to-play social network games                                                                                                                           | 3                           | Users play games in social settings                                                               | SG                                 |
| 150 Qik        | Skype                         | 1/7/11      | Mobile social network to share videos                                                                                                                       | 3                           | Users interact within their social groups around photos and videos                                | MP                                 |
| 151 Redbeacon  | The Home Depot                | 1//12       | Enables consumers find and interact with local businesses and professionals around home projects                                                            | 3                           | Facilitates consumer interactions with home improvement and repair professionals                  | EP                                 |

| <b>Target</b>         | <b>Acquirer</b>  | <b>Date</b> | <b>Target Description</b>                                                                                                  | <b>Category<sup>1</sup></b> | <b>Brief Justification</b>                                                                                                | <b>Primary Content<sup>2</sup></b> |
|-----------------------|------------------|-------------|----------------------------------------------------------------------------------------------------------------------------|-----------------------------|---------------------------------------------------------------------------------------------------------------------------|------------------------------------|
| 152 Revolution Health | Waterfront Media | 10/3/08     | Health-related portal and social network that enables interactions around medical topics                                   | 3                           | Users discuss health related topics with other users in a group setting with repeated interactions                        | OC                                 |
| 153 Rondee            | Yahoo            | 6/13/13     | Conference calling platform for social and professional groups                                                             | 3                           | Provides an interaction platform for user groups through free conference calling, online scheduling and response tracking | MP                                 |
| 154 SlideShare        | LinkedIn         | 5/3/12      | Document sharing through social networks like LinkedIn                                                                     | 3                           | Deep integration with LinkedIn – facilitates interactions around documents                                                | OC                                 |
| 155 Slingo.com        | Real Networks    | 7/31/13     | Social gaming platform that combines slot machines, bingo and cards                                                        | 3                           | Users play online games with other users in their social groups                                                           | SG                                 |
| 156 Turbine           | Warner Brothers  | 4/20/10     | Creator and operator of social games                                                                                       | 3                           | Users play online games with other users in their social groups                                                           | SG                                 |
| 157 Tutor.com         | IAC              | 1/7/13      | Provides on-demand homework help and tutoring services that connect students to professional tutors                        | 3                           | Facilitates repeated interaction between tutors and students                                                              | OC                                 |
| 158 V7n Network       | Escalate Media   | 6/20/2008   | An online community of webmasters where users post questions, answers and information on topics of interest to webmasters. | 3                           | A community of webmasters to facilitate interactions around topics of interest to the group                               | OC                                 |
| 159 WePlay            | TeamSnap         | 5/21/13     | Social networking site for youth athletes as well as a team management application for parents and coaches                 | 3                           | Facilitates interaction around team sports                                                                                | OC                                 |
| 160 ZipList           | Conde Nast       | 4/11/12     | Users (family members and friends) can create, edit and share shopping lists and tasks with others in a group              | 3                           | Facilitates interactions around shopping lists and shopping related tasks                                                 | OC                                 |

## Appendix B:

### Process for categorizing websites

For each firm in our sample, we collected two short descriptions of the firm. The first description was collected from [www.crunchbase.com](http://www.crunchbase.com) and the second description was collected from either Wikipedia.com or from the firm's own website. For those firms (about 10%) for which descriptions were not available either on Wikipedia or on the firm's own website, we collected these descriptions from either forbes.com or from wikiwand.com. Next, for each firm in our sample, we noted the URL corresponding to the archived version of the website from the Wayback machine (archive.org). This URL corresponded to website version on the date prior to the acquisition announcement. For about 10% of the firms, we used a version that was older if it was not available on the date of acquisition, and for a few firms which weren't archived, we used the current version of the firm's primary website. We then developed coding guidelines for these websites as described below.

### Coding Categories

We developed coding rules for categorizing our websites, based on both a) the descriptions of websites and b) the archived version of the website we obtained from the Wayback machine.

- a) Primary Content Category - Firm Generated Content, User Generated Content, Interaction Content. For this, coders categorized each firm into one of the three categories based on the firm's primary value proposition.
- b) Hybrid coding categories – coders also rated the extent to which the other two types of content (other than the primary content) manifested on the firm's website.
- c) Switching cost dimensions (*IntTools*, *Community* and *UserData*) - this was coded as described in the paper by following explicit rules that are repeated here.

### Coding Process

There were three phases of coding. First, two authors independently answered the survey questionnaire given below based on the coding guidelines. The authors refined the coding guidelines and repeated the categorization, to achieve an acceptable interrater reliability (IRR) of greater than 90%.

Second, eight senior Ph.D. students, responded to the survey questionnaire shown below to classify the firms in our sample. The authors conducted a 60 minute session for these coders to describe the coding exercise, explain the categories and answer questions. Additionally, the authors also provided each student written guidelines (shown below) for categorizing the firms into various categories. Firms were randomly assigned to the 8 Ph.D. students, so that each student coded 40 firms. As a result, each firm was coded by two coders. We measured the IRR and Cohen's kappa after this round of categorization. During our first run, the IRR was less than 80% and Cohen's kappa was less than 0.7. We clarified our category definitions based on a review session with the coders and modified the instructions.

During the third phase, we recruited a different set of 8 Ph.D. students to respond to the modified survey. Again, we conducted a 60 minute session describing our refined coding methodology and guidelines. Each student coded 40 firms, thereby categorizing each firm twice. An Inter-Rater Reliability (IRR) score of greater than 90% and Cohen's kappa of greater than 0.75 was accomplished during this round. Finally, the results of the survey were consolidated by a discussion of all cases by the authors when the categorization by the coders differed from the categorization done by the authors.

### **Website Classification Instructions to Coders**

You are being asked to classify a set of websites into one of three categories described below (*firm-generated content* websites, *user contributed content* websites and *interaction* websites). Please note that each category has several sub-categories. Please read the description of the categories and sub-categories below carefully.

It is possible that a website has characteristics of more than one category. In that case, consider the primary value proposition of the website to determine its single category. Is the primary value proposition of the website based on *firm generated content* or *user contributed content*, or is it based on the ability to provide an *interaction* platform for users. For example, a website with primarily editorial content may allow users to also post comments, but if the primary value proposition (why consumers visit the website) is based on editorial content, the site should be classified as *firm generated content*. Likewise, an e-commerce platform can provide a directory of service providers, but if the primary value proposition is based on providing a platform for buyers and sellers to interact, then it is an *interaction* website.

***Firm Generated Content Websites*** contain content created by the firm through employees and affiliates or through software and technology owned by the firm (e.g. search engines such as Yahoo, price comparison sites such as shopping.com, and directories such as yellowpages.com). The primary value proposition of these websites are not based on user-generated content, and the creation of content consumes firm resources (personnel and technology). Such websites may curate some UGC (e.g. user posts in the comment section of news articles), but the primary value proposition is based on firm generated content.

Editorial Content Websites where content is created by or controlled by the firm and its associates. Examples include news sites such as CNN.com, specialized content sites such as WebMD.com, and online dictionaries and encyclopedias (e.g. encyclopedia.com).

Search Tools scour the web for information and return links to other sites including, for example, general purpose (e.g. Yahoo.com), travel (e.g. Kayak.com), and real estate (e.g. Zillow.com) search.

Content Aggregators gather and aggregate information from other sites, but not from user initiated search. Typical topics include sports (e.g. SportingNews.com), products and services (e.g. shopping.com), or prices for services, financial products, and insurance (e.g. BankRate.com).

Listing and Directory Sites inventory businesses, restaurants, and service providers (e.g. YellowPages.com). Listed firms may provide data about themselves or the website may pull from public sources such as yellow pages, state agencies, or business registries. Consumers can typically compare products from multiple vendors.

Algorithmic Content Sites provide access to proprietary tools or algorithms such as currency convertors, games, maps, music players, weather predictions, and electronic payments (e.g. MapQuest.com, Weather.com).

***User Contributed Content Websites*** enable publicly accessible user contributed content such as video, music, questions and answers, ratings and feedback, jobs and resumes, and blogs.

User Uploaded Content Sites contain images, video, audio, white papers, or product literature (e.g. YouTube.com) distributed widely instead of within social or interest groups.

Rating and Review Sites facilitate access to the opinion of other users about businesses, restaurants and service providers (e.g. AngiesList.com, TripAdvisor.com).

Blog and Forum Hosting Sites host and support wide dissemination of blogs, not just among a social or interest groups (e.g. WordPress.com, blogger.com).

Job Posting Sites match candidate resumes and companies seeking to fill positions (e.g. Monster.com) with wide dissemination of resumes and job postings. Subsequent interactions primarily occur outside the website.

***Interaction Websites*** promote repeated interaction with people users know or with whom they share an interest, profession, or hobby. They provide a platform for interaction rather than a platform for content. Users may reveal their identity and create content visible only within a defined user group.

Social Networking Sites facilitate interactions among a social and professional circle (e.g. Facebook.com, LinkedIn.com). While users may create and upload content during interaction, the focus is on facilitating interactions and on limited distribution of created content.

Dating Sites encourage users to meet and interact with others (e.g. Match.com, Zoosk.com). Users upload their profiles and search for appealing profiles. Once a user locates a match, the website provides tools to facilitate subsequent interaction.

Social Gaming Sites offer entertainment within a social circle or interest group (e.g. Zynga.com, WeGame.com) and often integrate with social networking sites.

Online Communities engage participants and build a community with similar demographics (e.g. Togetherville.com for kids) or interests (e.g. shelfari.com for authors and book readers).

Messaging platforms to communicate with a defined group of people (e.g. WhatsApp, Skype.com).

Commerce platforms provide a platform for buyers and sellers to find and interact with others (e.g. etsy.com for connecting consumers and small businesses, Mechanical Turk for short term work)

## **The Survey Instrument for Coding**

We provided the following description of each firm to the coders.

**Description 1:** From Crunchbase ([www.crunchbase.com](http://www.crunchbase.com))

**Description 2: From Wikipedia or from the firm's website**

**Website:** Historical version of the website from Wayback Machine ([www.archive.org](http://www.archive.org)) and current version of the website (if available)

**1. Based on the primary value proposition of the website, please classify the website into one of the following three categories:**

- Firm Generated Content Website
- User Contributed Content Website
- Interaction Website

**2. What percentage of the value of the website is derived from firm generated content, user contributed content, and facilitating interactions between participants? (These should add up to 100 percent.)** Note: This question was used to corroborate the classification in question 1.

- Firm Generated Content Website
- User Contributed Content Website
- Interaction Website

**3. Based on the primary value proposition of the website, please indicate the extent to which you agree with the following: (Choices: Agree, Disagree, Neither Agree Nor Disagree)**

Note: This question was used to corroborate the classification in question 1.

1. The website provides content created or controlled by the firm and its associates.
2. The website provides a tool to search the web for information.
3. The website aggregates and curates content from other sites (but not in response to user-initiated search).
4. The website provides a directory of products, businesses, restaurants or services.
5. The website provides access to proprietary tools (such as for weather prediction, currency conversion, music players and electronic payments).
6. The website allows users to upload user generated content (e.g. pictures, audio, videos and white papers).
7. The website allows users to rate products and services.
8. The website hosts blogs and forums for wide dissemination.
9. The website allows users to post resumes and jobs.
10. The website facilitates interactions among members of a social or professional group.
11. The website facilitates users to meet and interact with people they do not know.
12. The website allows users to play online games with others in their social circle.

13. The website enables participants to build a community with similar demographics (e.g. community for kids) or interests (e.g. community of book readers).
14. The website enables participants to communicate with a defined group of other participants.
15. The website provides a platform for buyers and sellers to find and interact with each other

### Hybrid Classification

The hybrid classification variables were defined after the primary classification was determined for each website. Two coders were asked to rate on a scale of 1-5 the extent of firm-generated content, user-contributed content and interaction generated content on the website. For each website, we used the average score of the two coders for the two non-primary categories to define the six variables (FGC-U, FGC-I, UCC-F, UCC-I, IGC-F, IGC-U) that capture the hybrid classifications. For example, for a website that is coded as a firm-generated content (FGC) website, we use the average score for the other two categories (user-contributed content and interaction generated content) to define FGC-U and FGC-I.

### Website Categories

The three indicator variables (*IntTools*, *Community* and *UserData*) that capture the three website features described in the paper are coded for each target firm website based on whether the feature is present on the website. We visited the website at the time of acquisition (through the *Wayback Machine*) and systematically used the following rules.

The *IntTools* variable is coded as 1

- for all *interaction websites*
- for those *firm generated content* websites that allow participants to interact with each other (beyond simple commenting) such as by enabling reservations, payments or sales.
- Coded as 0 for all user-contributed content websites and the remaining firm-generated content websites

The *Community* variable is coded as 1

- for those *interaction websites* that enable interactions within defined groups (messaging platforms and social networking sites) or have a niche topical focus (online communities),
- for blog hosting sites (within the *user contributed content website* category)
- for some *firm generated content websites* that are targeted towards niche groups such as students, kids or teachers.
- Coded as 0 for all remaining websites

The *UserData* variable is coded as 1

- for all *user contributed content websites*
- for *interaction websites* that have user content (e.g. social networks, dating websites and some online communities that have user posts)
- for *firm generated content websites* that have user content (beyond simple commenting or posts) such as reviews or user written articles in addition to editorial content.
- Coded as 0 for all remaining websites

### **Overlap Between Website Categories and Website Features**

The table below shows the overlap between the primary website categories and website features. For each primary website category, the table shows the average value and standard deviation of the three website category variables (*UserData*, *IntTools*, *Community*)

| Website Category | <i>UserData</i> | <i>IntTools</i> | <i>Community</i> |
|------------------|-----------------|-----------------|------------------|
| FGC              | 0.23 (0.42)     | 0.09 (0.28)     | 0.16 (0.37)      |
| UCC              | 1 (0)           | 0 (0)           | 0.17 (0.38)      |
| IGC              | 0.54 (0.51)     | 1 (0)           | 0.76 (0.44)      |

## Appendix C

### Target Valuation Bias

Since our dependent variable in (4) is the price paid for the target in an acquisition, it can imprecisely measure the true value of the target. In addition to the value of the target, the price paid for the acquisition includes (a) over or underpayment (Reuer et al. 2012), and (b) synergy from the acquisition (Bauer and Matzler 2014; Makri et al. 2010) to the acquirer (such as strategic compatibility, cultural fit, increased scale economies) that may partially be passed on to the target through a higher price. Thus, the price of the target may be an imprecise measure of target value. To mitigate potential bias, we proxy for this measurement error and include it in (4).

Standard event study methods provide the abnormal return associated with the acquisition announcement. Under the efficient market hypothesis, the abnormal return for the buyer includes (a) over or underpayment, and (b) synergies from the acquisition to the buyer (Uhlenbruck et al. 2006). Thus, the abnormal return associated with the acquisition announcement is a proxy for the error in the measurement of target value. Unfortunately, it is only available for public targets. However, for acquisitions by non-public acquirers, we can use characteristics of the target and the deal to predict the abnormal return. Let AR be the buyer abnormal return for a 2-day event window (0, +1 day) associated with the announcement (Brown and Warner 1985).

$$AR = \beta_0 + \beta_1 L(TAge) + \beta_2 Ln(TNews) + \beta_3 DStock + \beta_4 Related + \varepsilon \quad (C1)$$

The basic intuition behind (C1) is that the mis-valuation (abnormal return to the acquirer) is driven by the hype associated with the target (captured by TNews), the availability of information about the target (captured by TAge and Related), and whether it was a stock (vs. cash) transaction (DStock). We first estimate the parameters in (1) using OLS regression through a set of 99 acquisition transactions by publicly traded buyers (80 of these transactions were included in our original set of 160 transactions and 19 additional transactions were not included in the original data set because the price paid for the targets was not reported). For these 99 transactions, we searched Factiva to determine the earliest date when any public news source announced the acquisition, adjusting the date if the announcement occurred after the markets closed or during a holiday. As is customary, we used a two day event period (0, +1), but an alternative three day event window (-1, +1) provided similar results. The Market Model (Brown and Warner 1985) estimates the percentage abnormal return (AR). For public acquirers use the actual value of AR (80 observations), and for non-public acquirers use (C1) to calculate the predicted value for AR (80 observations).

In the second step, we re-estimate our main model after including AR and excluding TAge, TNews, DStock and Related. Table 1 below shows the results of an OLS estimation of parameters. The confidence intervals (95%) of the AR variable overlap zero, indicating that the abnormal return did not affect valuation of the target. The results support all previous hypotheses. See Table C1

References:

- Reuer, J.J., Tong, T.W. and Wu, C.W., 2012. A signaling theory of acquisition premiums: Evidence from IPO targets. *Academy of Management Journal*, 55(3), pp.667-683.
- Bauer, F. and Matzler, K., 2014. Antecedents of M&A success: The role of strategic complementarity, cultural fit, and degree and speed of integration. *Strategic management journal*, 35(2), pp.269-291.
- Makri, M., Hitt, M.A. and Lane, P.J., 2010. Complementary technologies, knowledge relatedness, and invention outcomes in high technology mergers and acquisitions. *Strategic management journal*, 31(6), pp.602-628.
- Uhlenbruck, K., Hitt, M.A. and Semadeni, M., 2006. Market value effects of acquisitions involving Internet firms: A resource-based analysis. *Strategic Management Journal*, 27(10), pp.899-913.
- Brown, S.J. and Warner, J.B., 1985. Using daily stock returns: The case of event studies. *Journal of financial economics*, 14(1), pp.3-31.

Table C1: Target Mis-valuation Analysis

|                         |                   |
|-------------------------|-------------------|
| <i>Ln(TEmp)</i>         | 0.614*** (0.000)  |
| <i>Ln(TFunds)</i>       | 0.528*** (0.000)  |
| <i>Ln(TPatents)</i>     | -0.073 (0.696)    |
| <i>TForeign</i>         | -0.017 (0.958)    |
| <i>Ln(TAge)</i>         | -0.161 (0.102)    |
| <i>APublic</i>          | 0.052 (0.821)     |
| <i>Ln(APriorAcq)</i>    | 0.243*** (0.001)  |
| <i>Ln(APatents)</i>     | 0.069 (0.175)     |
| <i>Year2009</i>         | -0.873** (0.047)  |
| <i>Ln(TVisits)</i>      | 0.028 (0.681)     |
| <i>FGC</i>              | 1.268*** (0.002)  |
| <i>IGC</i>              | 0.799* (0.063)    |
| <i>FGC* Ln(TVisits)</i> | 0.184** (0.025)   |
| <i>IGC* Ln(TVisits)</i> | 0.300*** (0.004)  |
| <i>FGC* Ln(TFunds)</i>  | -0.491*** (0.004) |
| <i>IGC* Ln(TFunds)</i>  | -0.215 (0.214)    |
| <i>AR</i>               | -0.357 (0.845)    |
| <i>Intercept</i>        | 0.661 (0.325)     |
| N                       | 160               |
| R <sup>2</sup>          | 0.628             |
